# Supplementary material for: Effect of hand versus electronic signatures on response rates in postal surveys: a randomised controlled trial among emergency physicians in Canada
Source: HighWire-hosted journal article supplement (doi:10.1136/bmjopen-2022-061087), 2022-08-01
Supplement: bmjopen-2022-061087supp001_data_supplement.pdf [file bmjopen-2022-061087supp001_data_supplement.pdf]

|                  |  |  |  |  |
|------------------|--|--|--|--|
| Questionnaire ID |  |  |  |  |
|------------------|--|--|--|--|

## Appendix A: Survey Questionnaire

Are you currently treating adults in emergency medicine?

Yes  No

*If 'No', please return the survey in the pre-paid envelope provided.*

### CURRENT PRACTICE FOR BENIGN HEADACHES – DRUG THERAPIES

We are seeking your valued opinion on how often you use various therapies to treat benign headaches in the emergency department (ED). In this survey, benign headaches are defined as any non life-threatening headache (e.g., acute or chronic migraine, tension headache) where a secondary cause has been ruled out.

1. Please indicate your current pharmacological practice for treating benign headache disorders in the ED

|                                                                                                                        | Always                   | Most of the time         | Some of the time         | Almost never             | Never                    |
|------------------------------------------------------------------------------------------------------------------------|--------------------------|--------------------------|--------------------------|--------------------------|--------------------------|
| a) Intravenous (IV) NSAID (e.g., ketorolac)                                                                            | <input type="checkbox"/> |
| b) ORAL Non-Steroidal Anti-Inflammatory Drug (NSAID) (e.g., Naproxen, ibuprofen)                                       | <input type="checkbox"/> |
| c) ORAL acetaminophen                                                                                                  | <input type="checkbox"/> |
| d) IV dopamine antagonist (e.g., metoclopramide, chlorpromazine, prochlorperazine, promethazine, haloperidol, other)   | <input type="checkbox"/> |
| e) ORAL dopamine antagonist (e.g., metoclopramide, chlorpromazine, prochlorperazine, promethazine, haloperidol, other) | <input type="checkbox"/> |
| f) IV or ORAL Co-administration of ketorolac and a dopamine antagonist                                                 | <input type="checkbox"/> |
| g) Triptans                                                                                                            | <input type="checkbox"/> |
| h) Other antiemetics (e.g., dimenhydrinate, ondansetron)                                                               | <input type="checkbox"/> |
| i) Dihydroergotamine (DHE)                                                                                             | <input type="checkbox"/> |
| j) Oral opioids, (e.g., tramadol, morphine, hydromorphone)                                                             | <input type="checkbox"/> |
| k) Parenteral opioids (e.g., tramadol, morphine, hydromorphone, fentanyl)                                              | <input type="checkbox"/> |
| l) IV Sodium valproate                                                                                                 | <input type="checkbox"/> |
| m) IV Fluid Boluses $\geq$ 500 mL                                                                                      | <input type="checkbox"/> |
| n) Oxygen therapy for cluster headaches                                                                                | <input type="checkbox"/> |
| o) IV propofol                                                                                                         | <input type="checkbox"/> |
| p) IV ketamine                                                                                                         | <input type="checkbox"/> |
| q) IV magnesium                                                                                                        | <input type="checkbox"/> |
| r) Other drug therapy not listed above (please specify): _____                                                         | <input type="checkbox"/> |

2. Do you alter your ED pharmacological management based on type of headache you believe a patient may have (e.g., migraine versus tension/benign headache after ruling out a serious etiology)?

Yes  No

a. If yes, how? \_\_\_\_\_  
 \_\_\_\_\_  
 \_\_\_\_\_  
 \_\_\_\_\_

## PERSPECTIVES ON PERIPHERAL NERVE BLOCKS

In this survey, peripheral nerve blocks are defined as greater or lesser occipital nerve blocks, sphenopalatine ganglion (SPG) blocks/intranasal lidocaine or trigger point injections.

### 3. Have you ever used a peripheral nerve block in your treatment plan for benign headache disorders?

Yes  No (If you answer 'No', please move to question 4 on page 3)

#### a. If yes, how frequently have you used each peripheral nerve block for benign headaches in your practice?

|                                                              | ≥ 20 times               | 10-19 times              | ≤ 10 times               |
|--------------------------------------------------------------|--------------------------|--------------------------|--------------------------|
| i) Occipital nerve block                                     | <input type="checkbox"/> | <input type="checkbox"/> | <input type="checkbox"/> |
| ii) Sphenopalatine ganglion (SPG) block/intranasal lidocaine | <input type="checkbox"/> | <input type="checkbox"/> | <input type="checkbox"/> |
| iii) Trigger point injection                                 | <input type="checkbox"/> | <input type="checkbox"/> | <input type="checkbox"/> |

#### b. If yes, do you agree or disagree that alternative treatments such as peripheral nerve blocks could be *more effective* than current standard of care when treating benign headache disorders in the ED?

Agree  Disagree  I have not done enough peripheral nerve blocks to answer.

#### c. If yes, do you agree or disagree that peripheral nerve blocks are *safe* to use when treating benign headaches in the ED?

Agree  Disagree  I have not done enough peripheral nerve blocks to answer.

#### d. If yes, do you have a preferred peripheral nerve block for treating various benign headaches?

##### i) Migraine

Occipital nerve block  SPG block/intranasal lidocaine  Trigger point injection  N/A – I would not consider for this type of headache

##### ii) Tension

Occipital nerve block  SPG block/intranasal lidocaine  Trigger point injection  N/A – I would not consider for this type of headache

##### iii) Cluster headache

Occipital nerve block  SPG block/intranasal lidocaine  Trigger point injection  N/A – I would not consider for this type of headache

#### e. If yes, how would you describe your comfort level when administering a peripheral nerve block?

**i) Occipital nerve block**

- Very comfortable       Comfortable       Uncomfortable       Very uncomfortable       N/A - I do not perform this nerve block routinely

**ii) SPG block/intranasal lidocaine**

- Very comfortable       Comfortable       Uncomfortable       Very uncomfortable       N/A - I do not perform this nerve block routinely

**iii) Trigger point injection**

- Very comfortable       Comfortable       Uncomfortable       Very uncomfortable       N/A - I do not perform this nerve block routinely

**f. In your experience, do most patients experience a significant reduction in pain when given a peripheral nerve block?**

- Yes     No

**i) If yes, this significant reduction in pain was observed when administering: (check all that apply)**

- Greater or lesser occipital nerve block       SPG block/intranasal lidocaine       Trigger point injection

**4. Given sufficient evidence on effectiveness and safety from a randomized controlled trial, would you consider using a peripheral nerve block in the future as a first line treatment option for benign headaches?**

- Yes     No

If no, why not? \_\_\_\_\_

**5. If you perform the SPG block/intranasal lidocaine, which route of administration of anesthetic would you be most comfortable with? (check one)**

- Nasal cannula     Catheter device     Cotton tip applicator     Intranasal droplets     N/A - I do not know  
 Other: \_\_\_\_\_

**6. In a planned future trial comparing the SPG block/intranasal lidocaine to standard of care for benign headaches:****a) When is the most clinically meaningful time to reassess the patient's pain?**

- 15 min     30 min     60 min     90 min     120 min     Other (please specify): \_\_\_\_\_

**b) What would you consider a clinically significant improvement from baseline pain to the time you answered in question (6a), on a 10-point pain scale?**

- 1 points     2 points     3 points     4 points     5 points     Other (please specify): \_\_\_\_\_

**c) Would you consider enrolling your patients with a benign headache into such a study?**

- Yes     No     Uncertain (please specify): \_\_\_\_\_

**PHYSICIAN DEMOGRAPHICS AND PRACTICE SETTING**

*Please answer all questions*

**8. What is your gender?**

- Male     Female     Other (specify): \_\_\_\_\_     Prefer not to say

**9. How many years have you been practicing emergency medicine post-residency?**

- 1-4     5-9     10-19     20 or more

**10. Please check ALL the Canadian credentials you currently hold:**

- CCFP                       Other, if other please specify credentials: \_\_\_\_\_  
 CCFP-EM  
 FRCPC-EM

**11. In what setting do you perform MOST of your emergency medicine clinical activity?**

- Academic Health Centre                       Other: \_\_\_\_\_  
 Community / District General Hospital: Teaching  
 Community / District General Hospital: Non – Teaching  
 Rural

**12. Approximately how many patient visits, per year, are made to the ED you worked at MOST frequently?**

- < 30,000  
 30,000 – 59,999  
 60,000 – 79,999  
 > 80,000

*End of Survey*

---

*Please fold and return this survey to a mailbox in the pre-paid envelope provided.  
Thank you for taking the time to complete this survey!  
Your input is appreciated.*

---

**Additional comments:** Please feel free to add comments or feedback in the space provided below:
